[Download Supplemental Data](#)
